# Supplementary material for: Polydopamine-based molecular imprinting on silica-modified magnetic nanoparticles for recognition and separation of bovine hemoglobin
Source: Royal Society of Chemistry journal article supplement (doi:10.1039/c2an36313e), 2012-11-06
Supplement: c2an36313e.pdf [file c2an36313e.pdf]

## Supplementary Information

### Polydopamine-based Molecular Imprinting on Silica-modified Magnetic Nanoparticles for Recognition and Separation of Bovine Hemoglobin

Xiaoping Jia, Yuzhi Wang\*, Dan Ran, Shan Yang, Min Zhang

State Key Laboratory of Chemo/ Biosensing and Chemometrics, College of Chemistry  
and Chemical Engineering, Hunan University, Changsha, 410082, P.R.China

**Corresponding author: Professor Yuzhi Wang**

State Key Laboratory of Chemo/Biosensing and Chemometrics

College of Chemistry and Chemical Engineering

Hunan University

Changsha 410082

P. R. China

Phone: +86-731-88821903

Fax: +86-731-88821848

E-mail: [wyzss@hnu.edu.cn](mailto:wyzss@hnu.edu.cn)

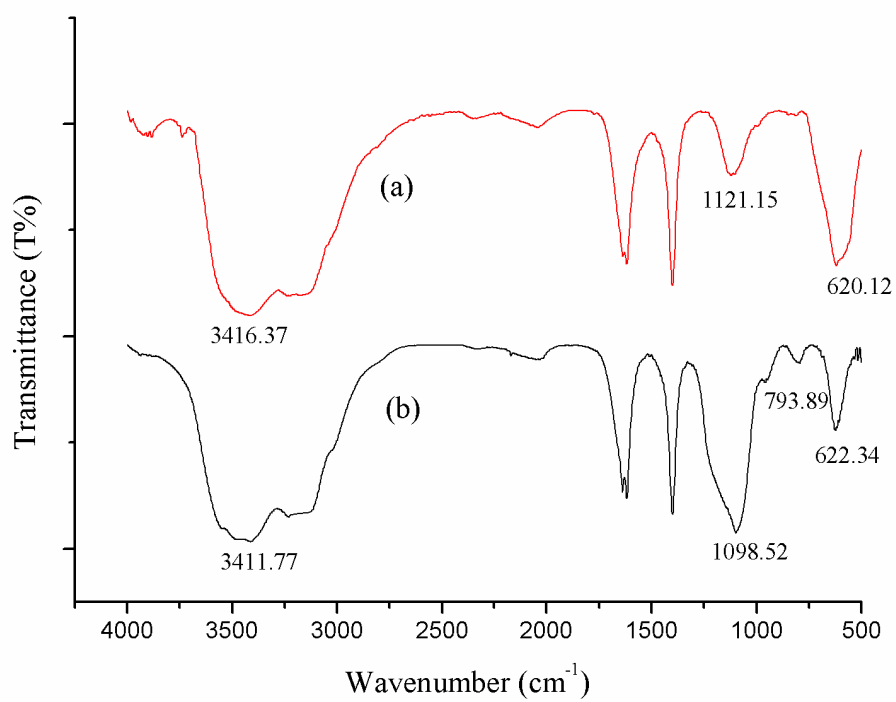

**Figure S1.** The FT-IR spectra of Fe<sub>3</sub>O<sub>4</sub> nanoparticles (a) and silica-modified Fe<sub>3</sub>O<sub>4</sub> nanoparticles (b)

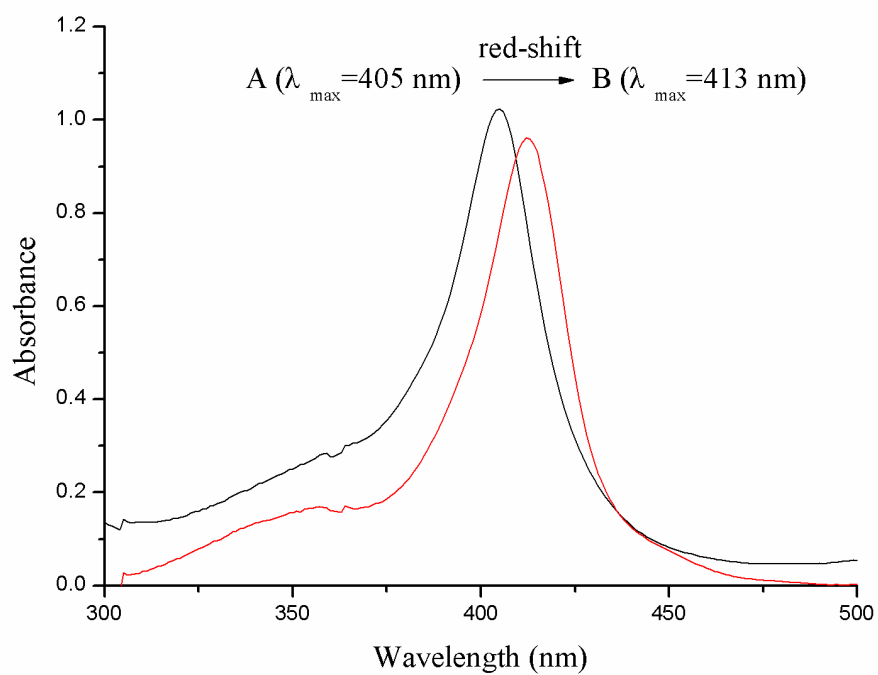

**Figure S2.** The UV-vis spectra of BHb in the absence (A) and presence of 0.01% SDS (B) in PBS.  $C_{\text{BHb}} = 0.2 \text{ mg mL}^{-1}$ , PBS (10 mM, pH 7.5).
